# Supplementary material
Source: PubMed Central journal article supplement (PMC6146983)
Supplement: zam019188770s1.pdf [file zam019188770s1.pdf]

**A novel  $\beta$ -glucuronidase from *Talaromyces pinophilus* Li-93 precisely  
hydrolyzes glycyrrhizin into glycyrrhetic acid  
3-O-mono- $\beta$ -D-glucuronide**

Yinghua Xu<sup>#a</sup>, Xudong Feng<sup>#a</sup>, Jintong Jia<sup>a</sup>, Xinyi Chen<sup>a</sup>, Tian Jiang<sup>a</sup>, Aamir Rasool<sup>a</sup>,  
Bo Lv<sup>a</sup>, Liangti Qu<sup>b</sup>, Chun Li<sup>\*a</sup>

<sup>a</sup> Institute for Synthetic Biosystem/Department of Biochemical Engineering, School  
of Chemistry and Chemical Engineering, Beijing Institute of Technology, Beijing  
100081, P. R. China

<sup>b</sup> Beijing Key Laboratory of Photoelectronic/Electrophotonic Conversion Materials,  
Key Laboratory of Cluster Science, Ministry of Education, School of Chemistry and  
Chemical Engineering, Beijing Institute of Technology, Beijing 100081, P. R. China.

<sup>#</sup>These authors contributed equally to this paper.

<sup>\*</sup>Corresponding author: Chun Li, Email: lichun@bit.edu.cn

**TABLE S1 The specific activity and catalytic efficiency of the published GUSs on GL**

| Enzyme                    | specific activity<br>( $\mu\text{mol}^{-1} \text{min}^{-1} \text{mg}^{-1}$ ) | $k_{\text{cat}}/K_m$ ( $\text{mM}^{-1}\text{s}^{-1}$ ) | Reference  |
|---------------------------|------------------------------------------------------------------------------|--------------------------------------------------------|------------|
| TpGUS79A                  | 11.97                                                                        | 11.14                                                  | This study |
| $\beta$ -glucuronidase I  | 0.32                                                                         | NA*                                                    | (1)        |
| $\beta$ -glucuronidase II | 0.19                                                                         | NA                                                     | (1)        |
| PGUS-P                    | 9.79E-3                                                                      | 6.40E-4                                                | (2)        |
| PGUS-E                    | 8.62E-3                                                                      | 3.86E-3                                                | (2)        |
| AtGUS-E                   | NA                                                                           | 2.24                                                   | (3)        |

\* Not available

**TABLE S2 The specific activity and catalytic efficiency of the published GUSs on baicalin**

| Enzyme   | Specific activity<br>( $\mu\text{mol}^{-1}\text{min}^{-1}\text{mg}^{-1}$ ) | $k_{\text{cat}}/K_m$ ( $\text{mM}^{-1}\text{s}^{-1}$ ) | Reference  |
|----------|----------------------------------------------------------------------------|--------------------------------------------------------|------------|
| TpGUS79A | 0.56                                                                       | 0.29                                                   | This study |
| LcGUS30  | 7.57                                                                       | 14.0                                                   | (4)        |
| SvGUS    | 9.37                                                                       | NA*                                                    | (5)        |

\* Not available

## References

1. Hye-Young P, Kim NY, Han MJ, Bae EA, Kim DH. 2005. Purification and characterization of two novel beta-D-glucuronidases converting glycyrrhizin to 18 beta-glycyrrhetic acid-3-O-beta-D-glucuronide from *Streptococcus* LJ-22. J Microbiol Biotechnol 15:792-799.
2. Zou S, Guo S, Kaleem I, Li C. 2013. Purification, characterization and comparison of *Penicillium purpurogenum*  $\beta$ -glucuronidases expressed in *Escherichia coli* and *Pichia pastoris*. J Chem Technol Biotechnol 88:1913-1919.
3. Liu Y, Huangfu J, Qi F, Kaleem I, E W, Li C. 2012. Effects of a non-conservative sequence on the properties of beta-glucuronidase from *Aspergillus terreus* Li-20. PLoS One 7:e30998.
4. Sakurama H, Kishino S, Uchibori Y, Yonejima Y, Ashida H, Kita K, Takahashi S, Ogawa J. 2014. beta-Glucuronidase from *Lactobacillus brevis* useful for baicalin hydrolysis belongs to glycoside hydrolase family 30. Appl Microbiol Biotechnol 98:4021-4032.
5. Zhang CZ, Zhang YF, Chen JP, Liang XM. 2005. Purification and characterization of baicalin-beta-D-glucuronidase hydrolyzing baicalin to baicalein from fresh roots of *Scutellaria viscidula* Bge. Process Biochem 40:1911-1915.

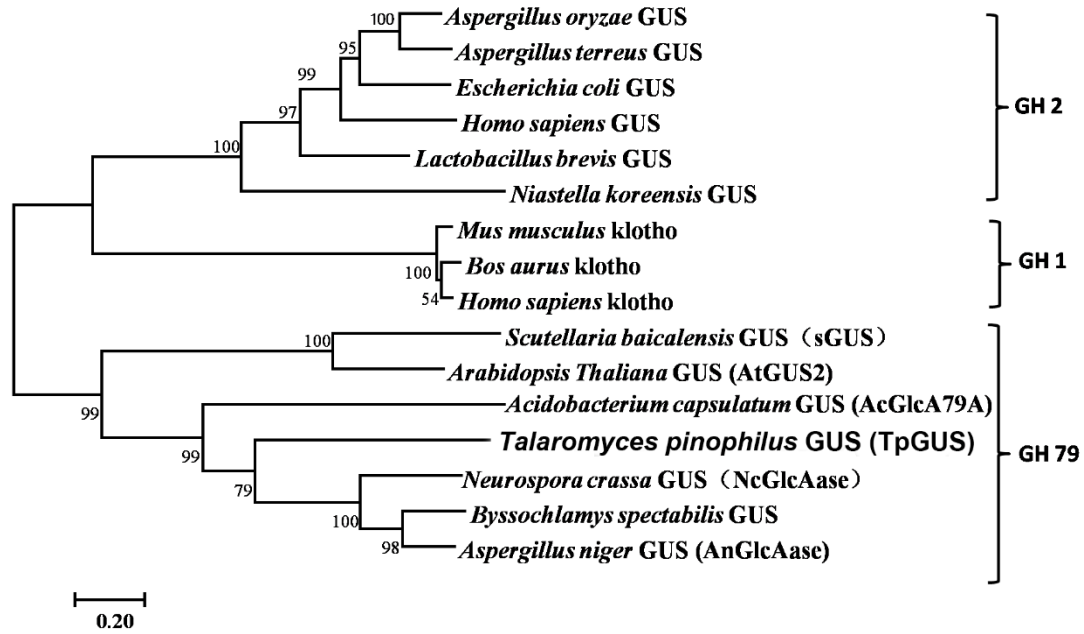

**FIG S1** The phylogenetic analysis of TpG79A with other GUSs from GH1, GH2 and GH79 based on their amino acid sequences. The phylogenetic tree was constructed using MEGA 7 with a neighbor-joining method. On the phylogenetic tree, the GH79 GUSs include enzymes from *S. baicalensis* (10/29(34%) identity, AB040072), *A. Thaliana* (26/111(23%) identity, NP\_196400), *A. capsulatum* (114/459 (25%) identity, PDB: 3VNY\_A), *N. crassa* (144/432(33%) identity, XP\_964763), *B. spectabilis* (160/462 (35%) GAD97470), and *A. niger* (128/377(34%) identity, GAQ47476); The GH2 GUSs include enzymes from *A. oryzae* (ABU68712), *A. terreus* (AEP39213), *E. coli* (PDB: 3K46\_A), *Homo sapiens* (PDB: 3HN3\_A), *L. brevis* (ACU21612) and *N. koreensis* (AEW00660); The GH1 GUSs include enzymes from *M. musculus* (BAA23381), *B. aurus* (NP\_001178124), *Homo sapiens* (BAA23382).

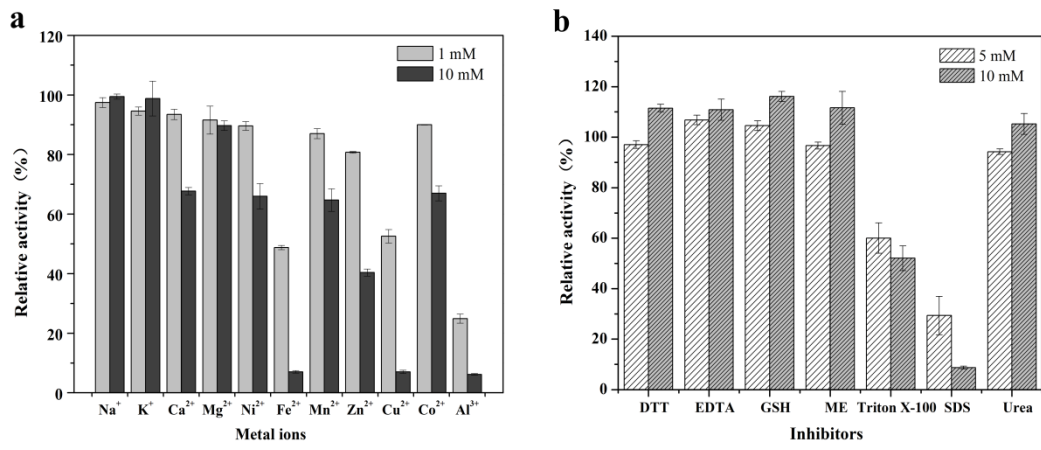

**FIG S2** Effect of metal ions (a) and inhibitors (b) on TpGUS79A activity. The experiment was performed in triplicate measurements, and the errors stand for one standard deviation.

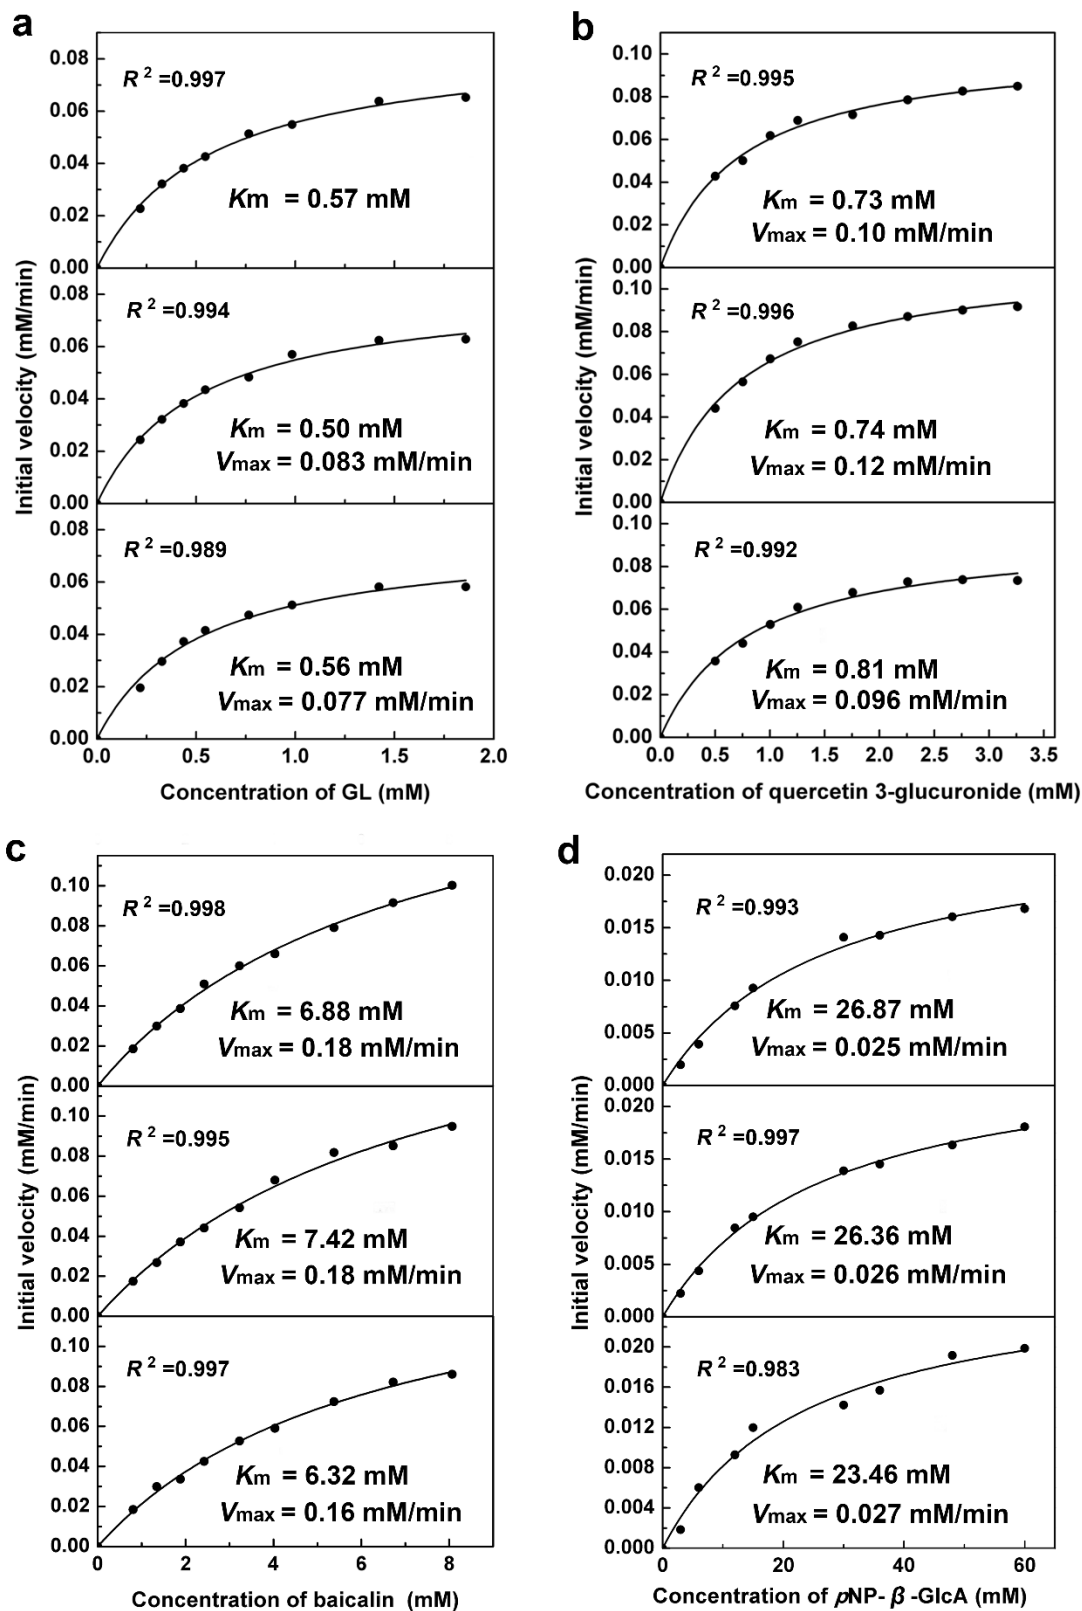

**FIG S3** Michaelis-Menten plots of TpGUS79A hydrolyzing the different substrates. a: glycyrrhizin (GL), b: quercetin 3-glucuronide, c: baicalin, d: pNP- $\beta$ -GlcA.

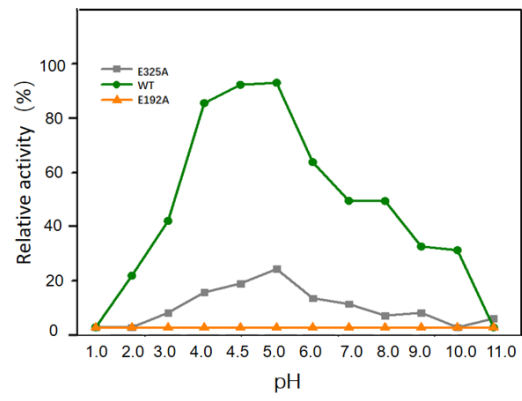

**FIG S4** Activity rescue test of TpGUS79A mutants E192A and E325A.

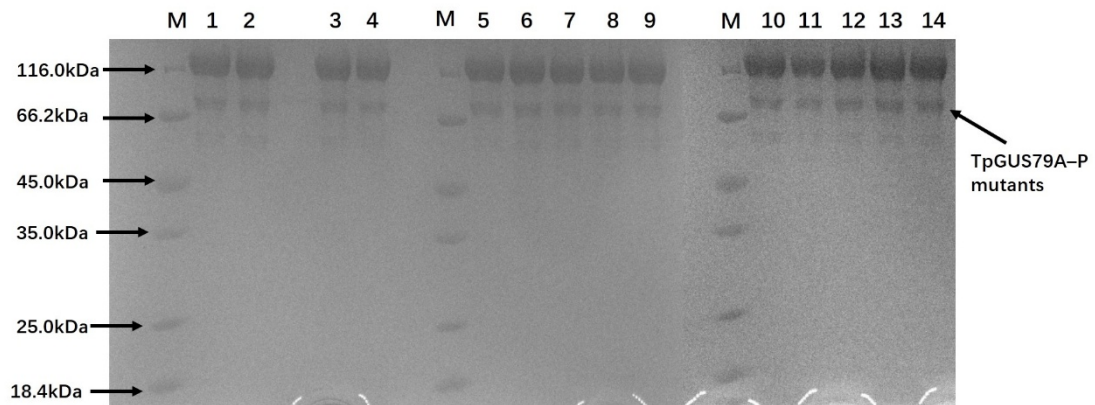

**FIG S5** The SDS-PAGE of the purified TpGUS79A-P mutants. Lane M: marker, Lane 1: S330A, Lane 2: H365D, Lane 3: E192A, Lane 4: N191A, Lane 5: C331A, Lane 6: Y372K, Lane 7: C331D, Lane 8: E325A, Lane 9: Y372D, Lane 10: C331K, Lane 11: Y276A, Lane 12: S330R, Lane 13: S95A, Lane 14: Y372A.

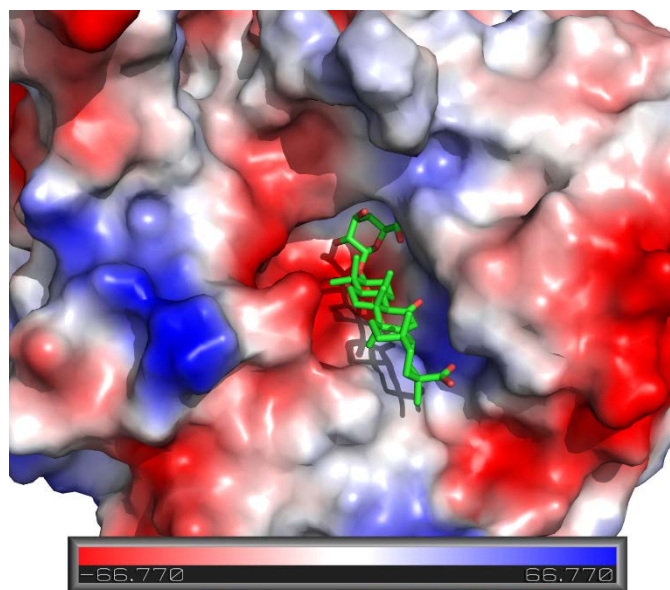

**FIG S6** The electrostatic potential distribution of the active pocket of GH2  $\beta$ -glucuronidase from *Aspergillus oryzae* Li-3. The green stick stands for the substrate glycyrrhetic acid 3-*O*-mono- $\beta$ -D-glucuronide. The image was reproduced from PDB 5C71.



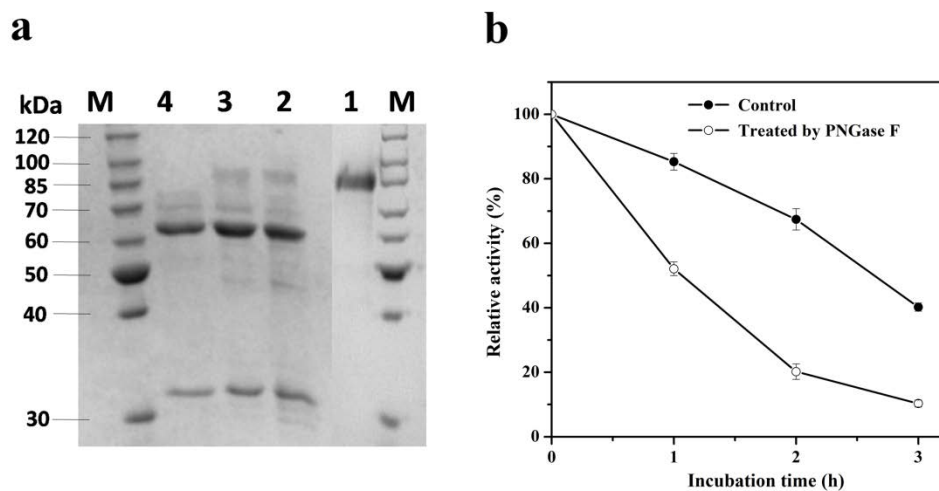

**FIG S7** The effect of N-glycosylation on TpGUS79A activity (a) SDS-PAGE analysis of TpGUS79A treated with PNGase F in the non-denaturing reaction condition at different incubation time. Lane 1: 0 h, Lane 2: 1 h, Lane 3: 2 h, Lane 4: 3h. (b) The activity of TpGUS79A natively deglycosylated by PNGase F on GL. The activity for GL was assayed at 50 °C for 5 min in 50 mM NaAc-HAc buffer (pH 4.5). Data represent the mean  $\pm$  one standard deviation of results from the experiments in triplicate.
